# Supplementary material
Source: publisher figshare collection journal article supplement (https://tandf.figshare.com/articles/dataset/_/12123903)

Figure 1. The classification and regression tree analysis where all variables were automatically selected from a set of demographic features, intraocular inflammatory findings, and their sequelae recorded in a cohort of 114 patients with Behçet disease uveitis and 322 patients with non-Behçet uveitides.

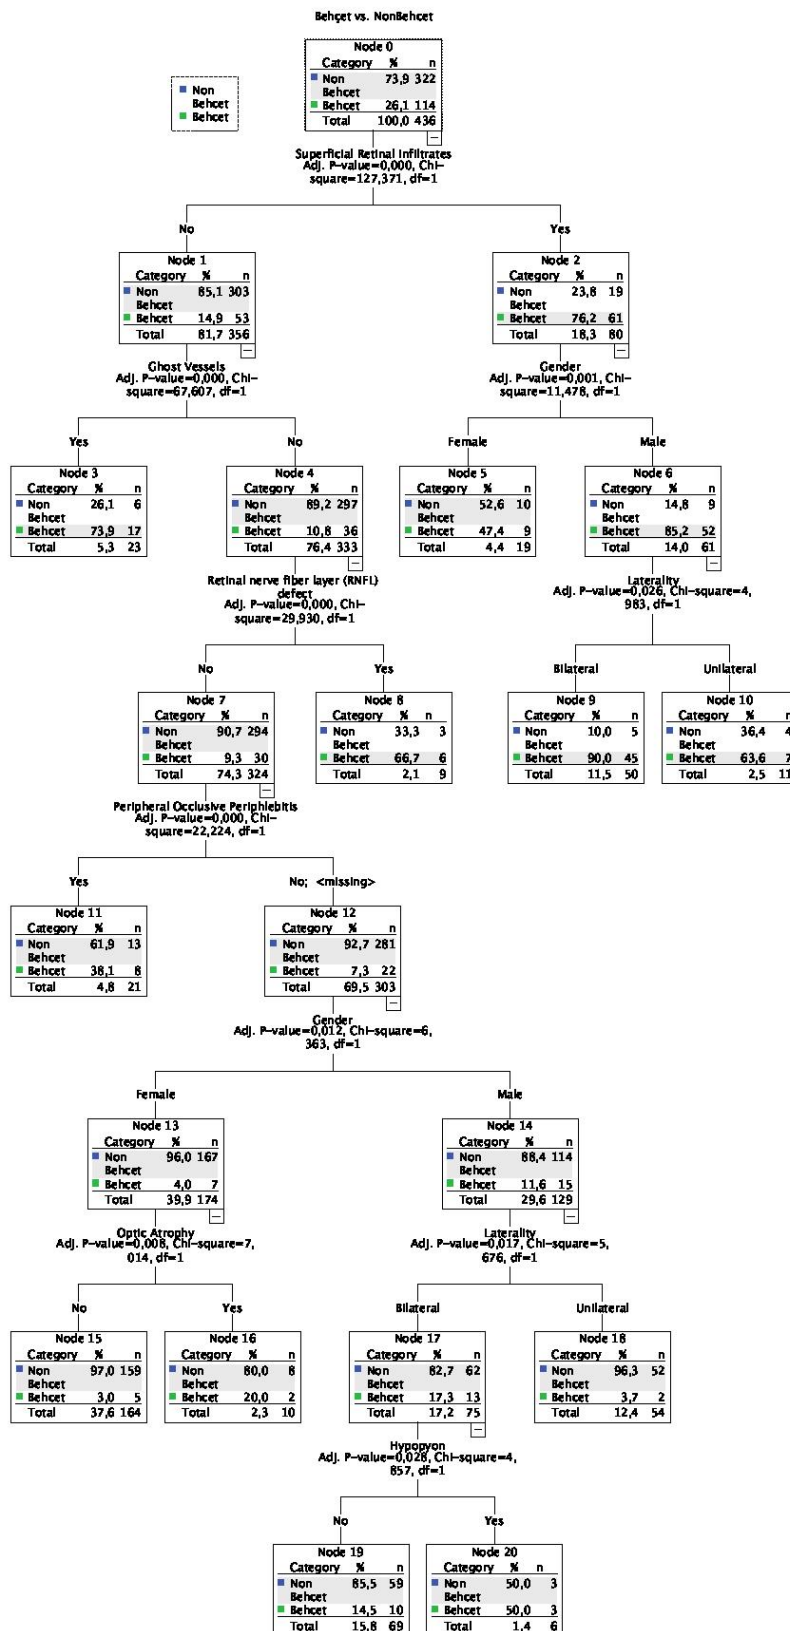

Supplement: Supplementary file 1 [file 1]
