# Supplementary material
Source: publisher figshare collection journal article supplement (https://tandf.figshare.com/articles/dataset/_/12123903)

Figure 2. The classification and regression tree analysis where “vitritis” was selected as the first variable and the remaining variables were automatically selected from a set of demographic features, intraocular inflammatory findings, and their sequelae recorded in a cohort of 114 patients with Behçet disease uveitis and 322 patients with non-Behçet uveitides.

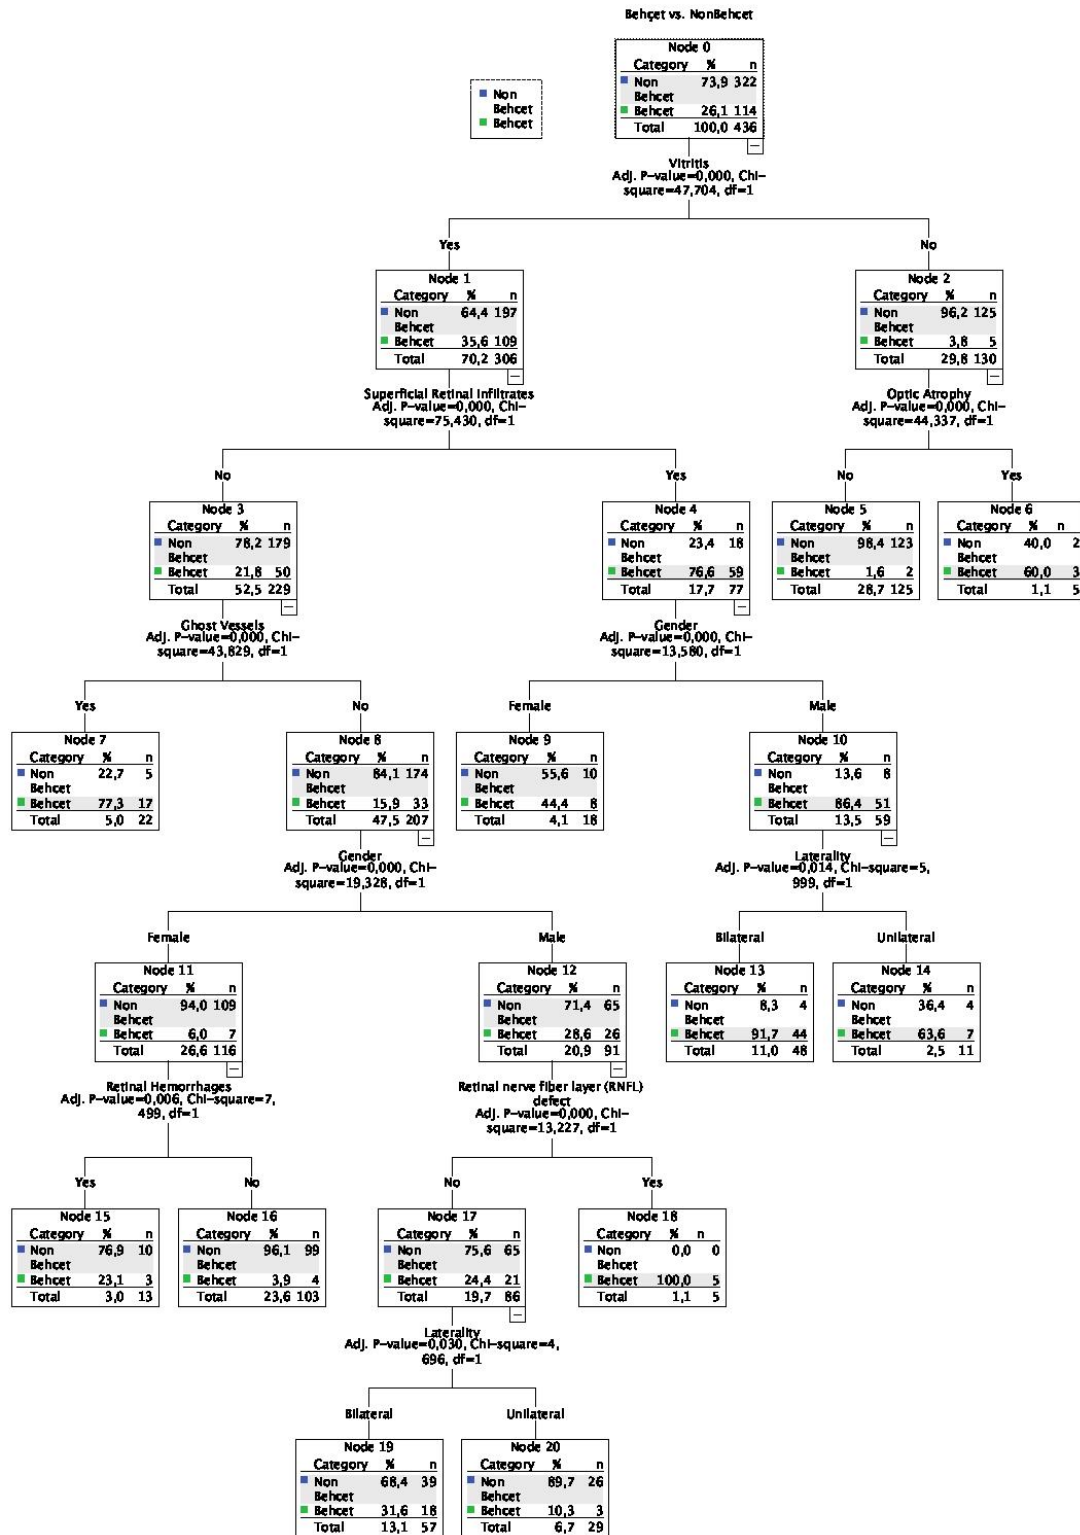

Supplement: Supplementary file 2 [file 1]
